# Supplementary material
Source: HighWire-hosted journal article supplement (https://erj.ersjournals.com/content/51/6/1800467)
Supplement: inline-supplementary-material-1 [file inline-supplementary-material-1.pdf]

**Lower DHEA-S Levels Predict Disease and Worse Outcomes in Post-Menopausal Women  
with Idiopathic, Connective Tissue Disease- and Congenital Heart Disease-Associated  
PAH**

Supplementary Material

**Table S1. Generalized estimating equations of hormone levels by case status**

| <b>Sex hormone</b>               | <b>PAH Case</b>    | <b>Control</b>     | <b>P-value</b> |
|----------------------------------|--------------------|--------------------|----------------|
| Estradiol, pg/mL                 | 7.2<br>6.2, 8.5    | 6.0<br>5.3, 6.8    | 0.02           |
| DHEA-S, µg/dL                    | 25.1<br>19.5, 32.4 | 61.9<br>54.0, 71.0 | <0.001         |
| Total testosterone, ng/dL        | 4.2<br>3.5, 5.1    | 8.5<br>7.4, 9.7    | <0.001         |
| Bioavailable testosterone, ng/dL | 1.3<br>1.1, 1.5    | 2.3<br>2.0, 2.6    | <0.001         |
| Progesterone, ng/mL              | 0.1<br>0.1, 0.1    | 0.1<br>0.1, 0.1    | 0.29           |
| SHBG, nmol/L                     | 44.6<br>41.0, 48.5 | 60.8<br>55.0, 67.2 | <0.001         |

Data are medians with 95% confidence intervals. Matched on age within 5 years and body mass index (BMI) within 4 kg/m<sup>2</sup> and adjusted for age and BMI. DHEA-S=dehydroepiandrosterone-sulfate, SHBG=sex hormone-binding globulin. Lognormal distribution was used.

## **SUPPLEMENTARY FIGURE LEGENDS**

**Figure S1.** Adjusted parameter estimates for hormone levels by case status after matching for age and body mass index. Panel a) total testosterone (T); Panel b) bioavailable testosterone (BioT); Panel c) progesterone; Panel d) sex hormone binding globulin (SHBG). Boxes represent medians and whiskers represent 95% confidence interval. PAH=pulmonary arterial hypertension.

**Figure S2.** Adjusted parameter estimates for hormone levels by functional class in PAH cases. Panel a) total testosterone (T); Panel b) sex hormone binding globulin (SHBG). Boxes represent medians and whiskers represent 95% confidence interval. P value=test for trend across category.

**Figure S3.** Adjusted parameter estimates for hormone levels by degree of right ventricular dilatation (Panels a, c) and dysfunction (Panels b, d) on echocardiogram in PAH cases. Panels a, b) total testosterone (Total T); Panels c, d) sex hormone binding globulin (SHBG). Boxes represent medians and whiskers represent 95% confidence interval. P value=test for trend across category. RV=right ventricle.
